# Supplementary material
Source: PubMed Central journal article supplement (PMC11096044)
Supplement: NIHMS1979611-supplement-3.pdf [file NIHMS1979611-supplement-3.pdf]

# Supplementary Figure S1.

**A**

## Lollipop plots for TP53, RB1 and ATRX in STLMS and ULMS.

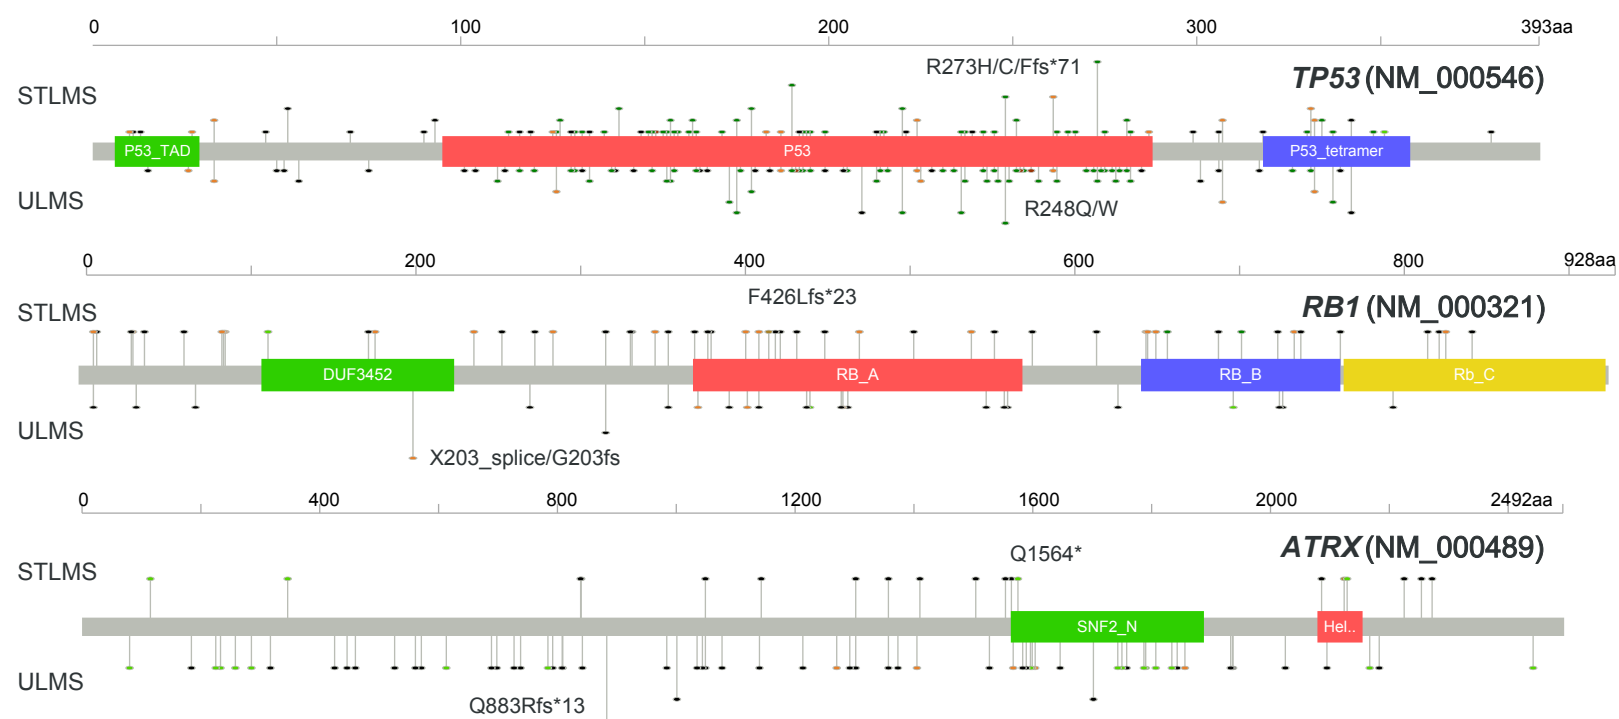

**B**

### STLMS (Primary)

### STLMS (Metastatic)

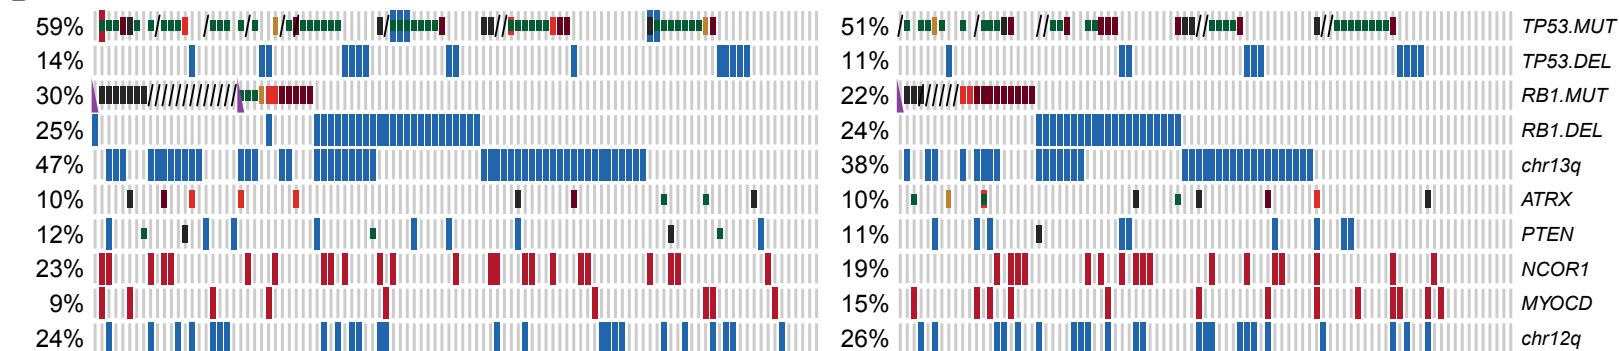

**C**

### ULMS (Primary)

### ULMS (Metastatic)

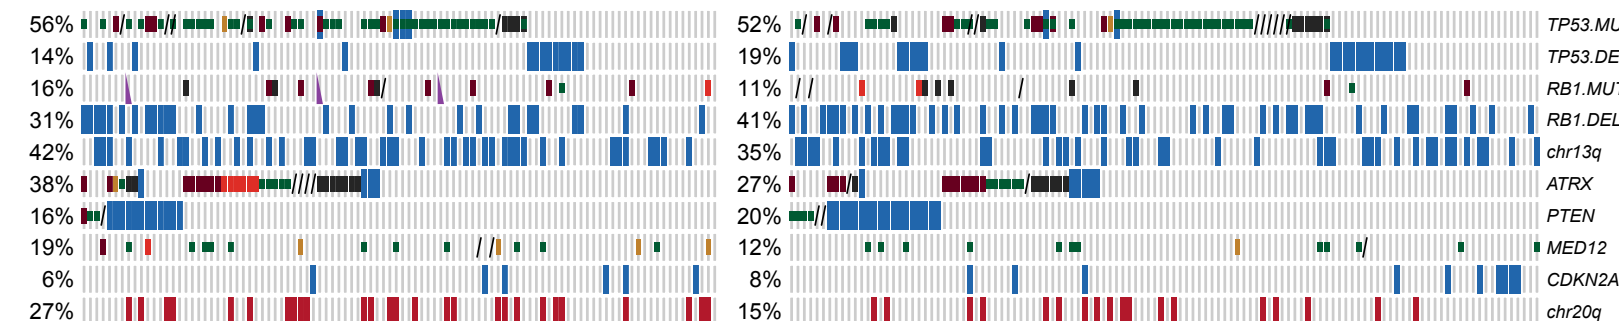

#### Alteration Type

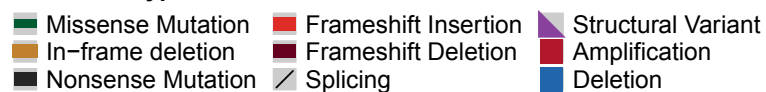

**Supplementary Figure S1.** A. Lollipop plots depicting the distribution of point mutations in TP53, RB1 and ATRX in STLMS and ULMS. B-C. Oncoprints in STLMS (B) and ULMS (C) depicting the distribution of recurrent genetic alterations in primary versus metastatic samples (unpaired).
