# Supplementary material
Source: PubMed Central journal article supplement (PMC11096044)
Supplement: NIHMS1979611-supplement-5.pdf [file NIHMS1979611-supplement-5.pdf]

A

Soft Tissue Leiomyosarcoma (MSKCC Cohort)

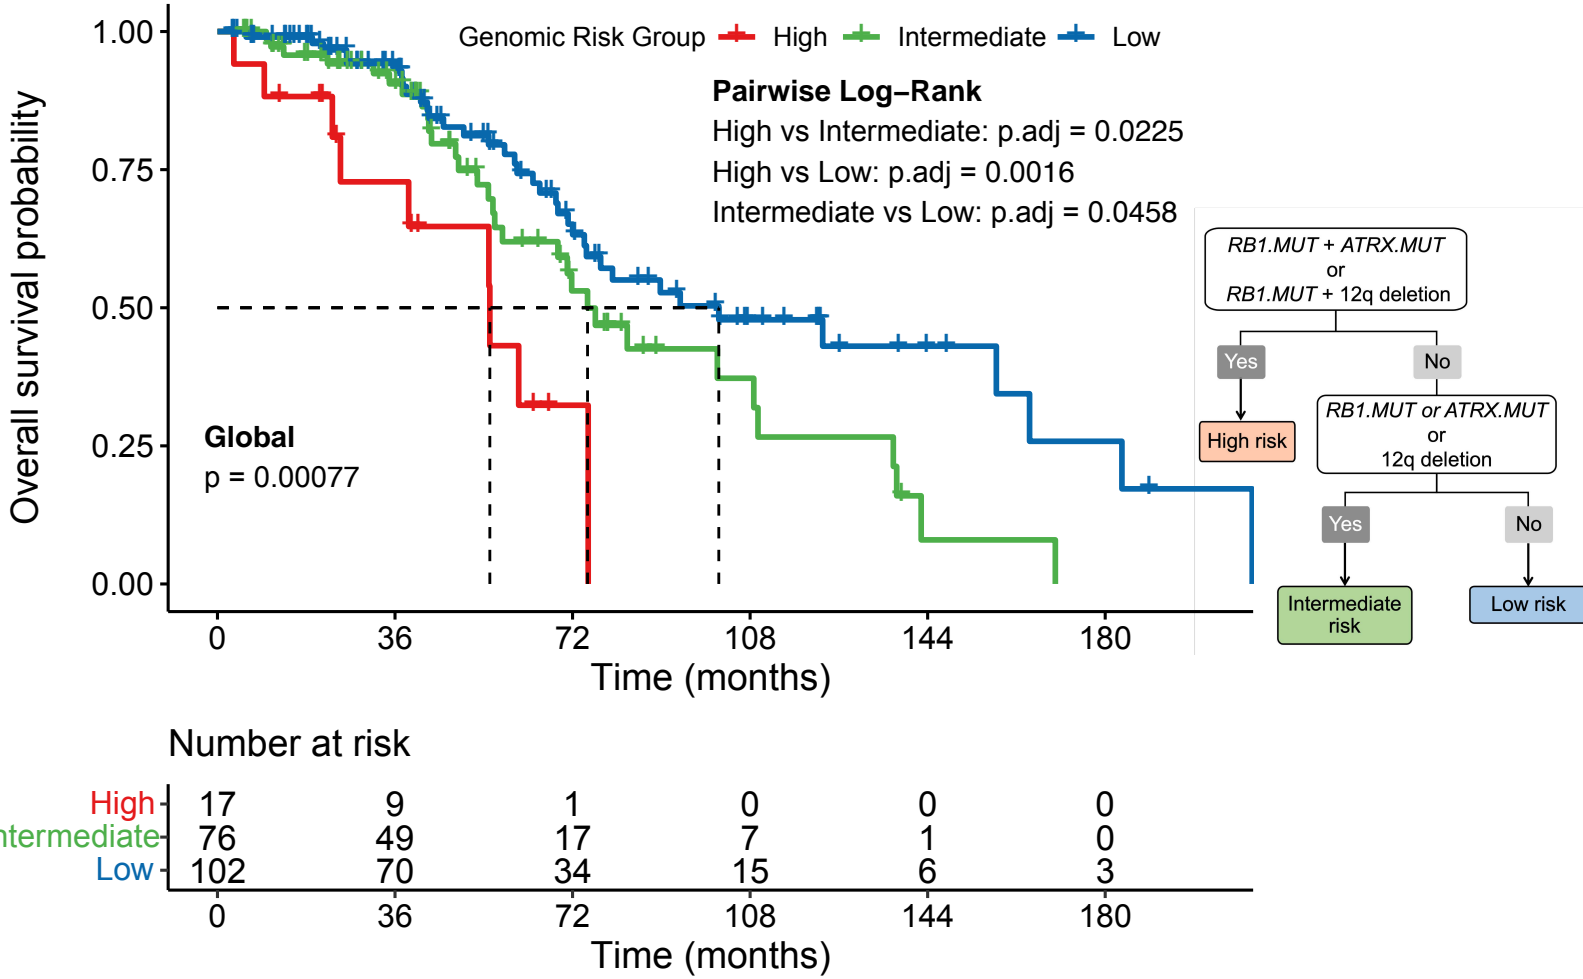

**Supplementary Figure S3.** Overall survival (OS) for 195 STLMS patients from the MSK cohort stratified by in low-, intermediate-, and high-risk genomic groups represented by Kaplan-Meier curves.
