# Supplementary material
Source: PubMed Central journal article supplement (PMC11096044)
Supplement: NIHMS1979611-supplement-6.pdf [file NIHMS1979611-supplement-6.pdf]

Suppl.Fig.S4.

Soft Tissue Leiomyosarcoma (Primary at Presentation)

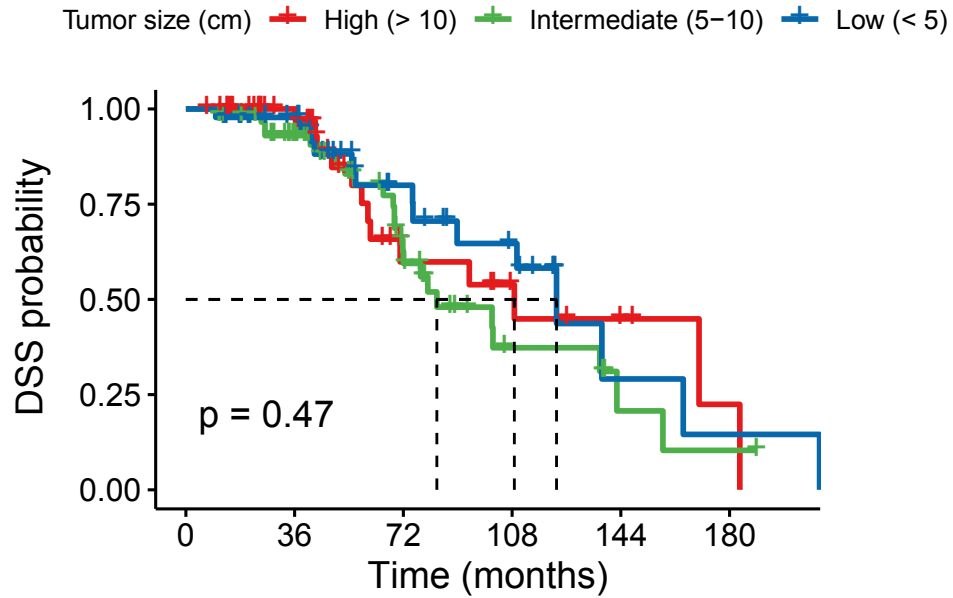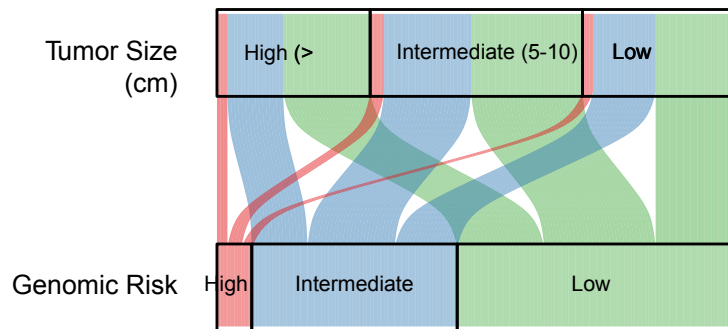

**Supplementary Figure S4.** Disease-specific survival (DSS) for STLMS patients (primary at presentation) from the MSK cohort stratified by tumor size represented by Kaplan-Meier curves. Bottom: Alluvial diagram comparing tumor size versus genomic risk groups in STLMS.
