# Supplementary material
Source: PubMed Central journal article supplement (PMC11096044)
Supplement: NIHMS1979611-supplement-7.pdf [file NIHMS1979611-supplement-7.pdf]

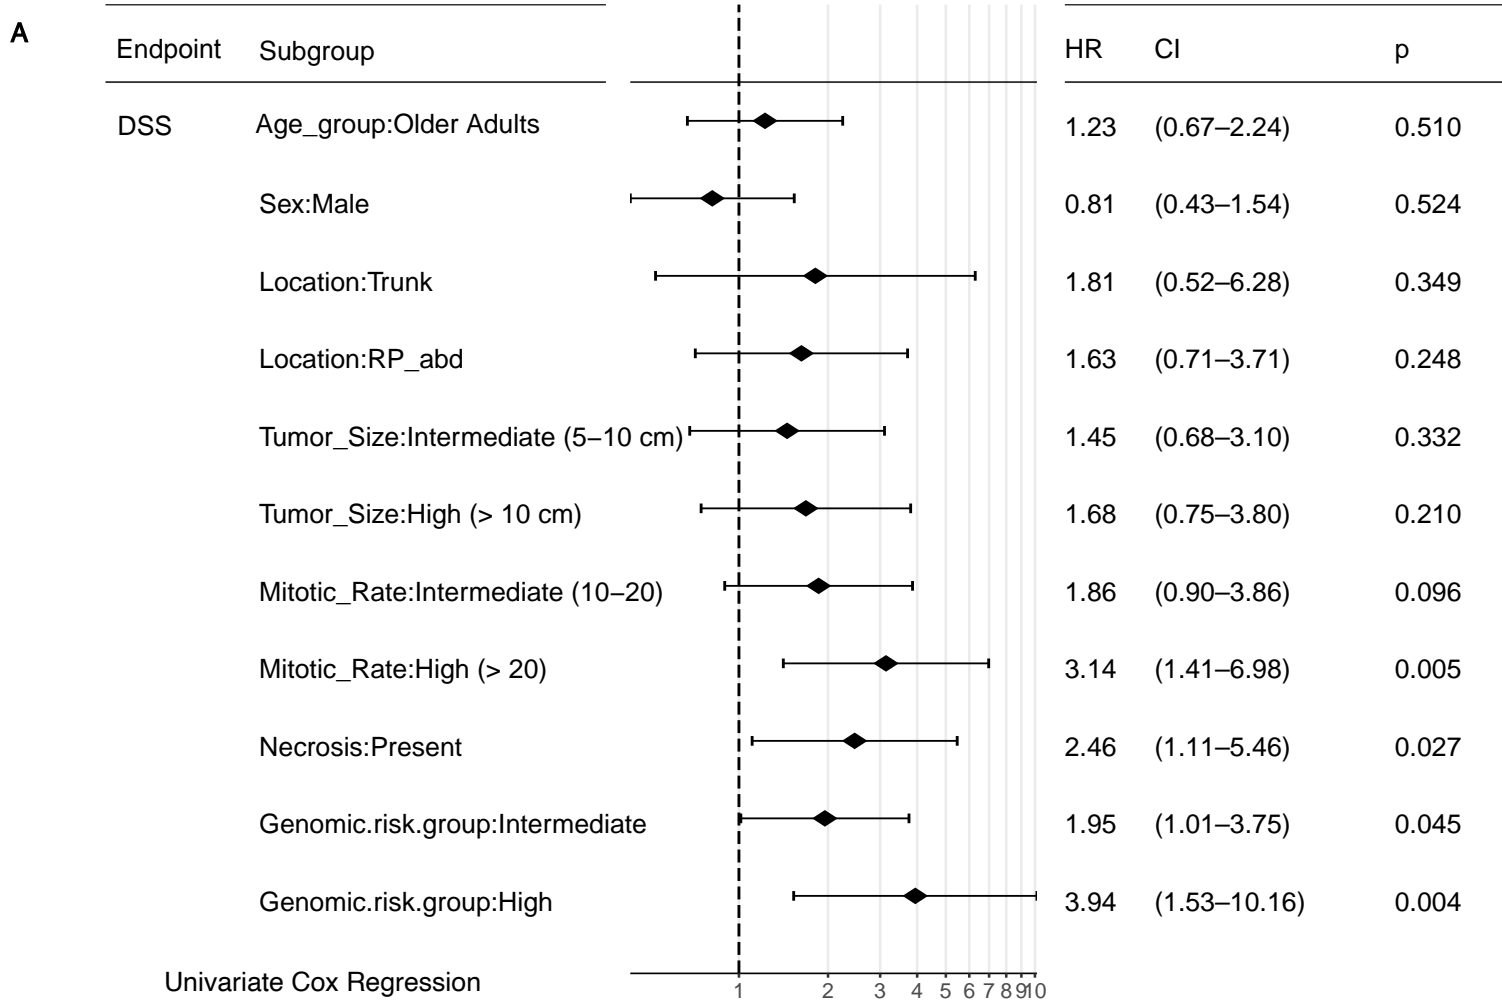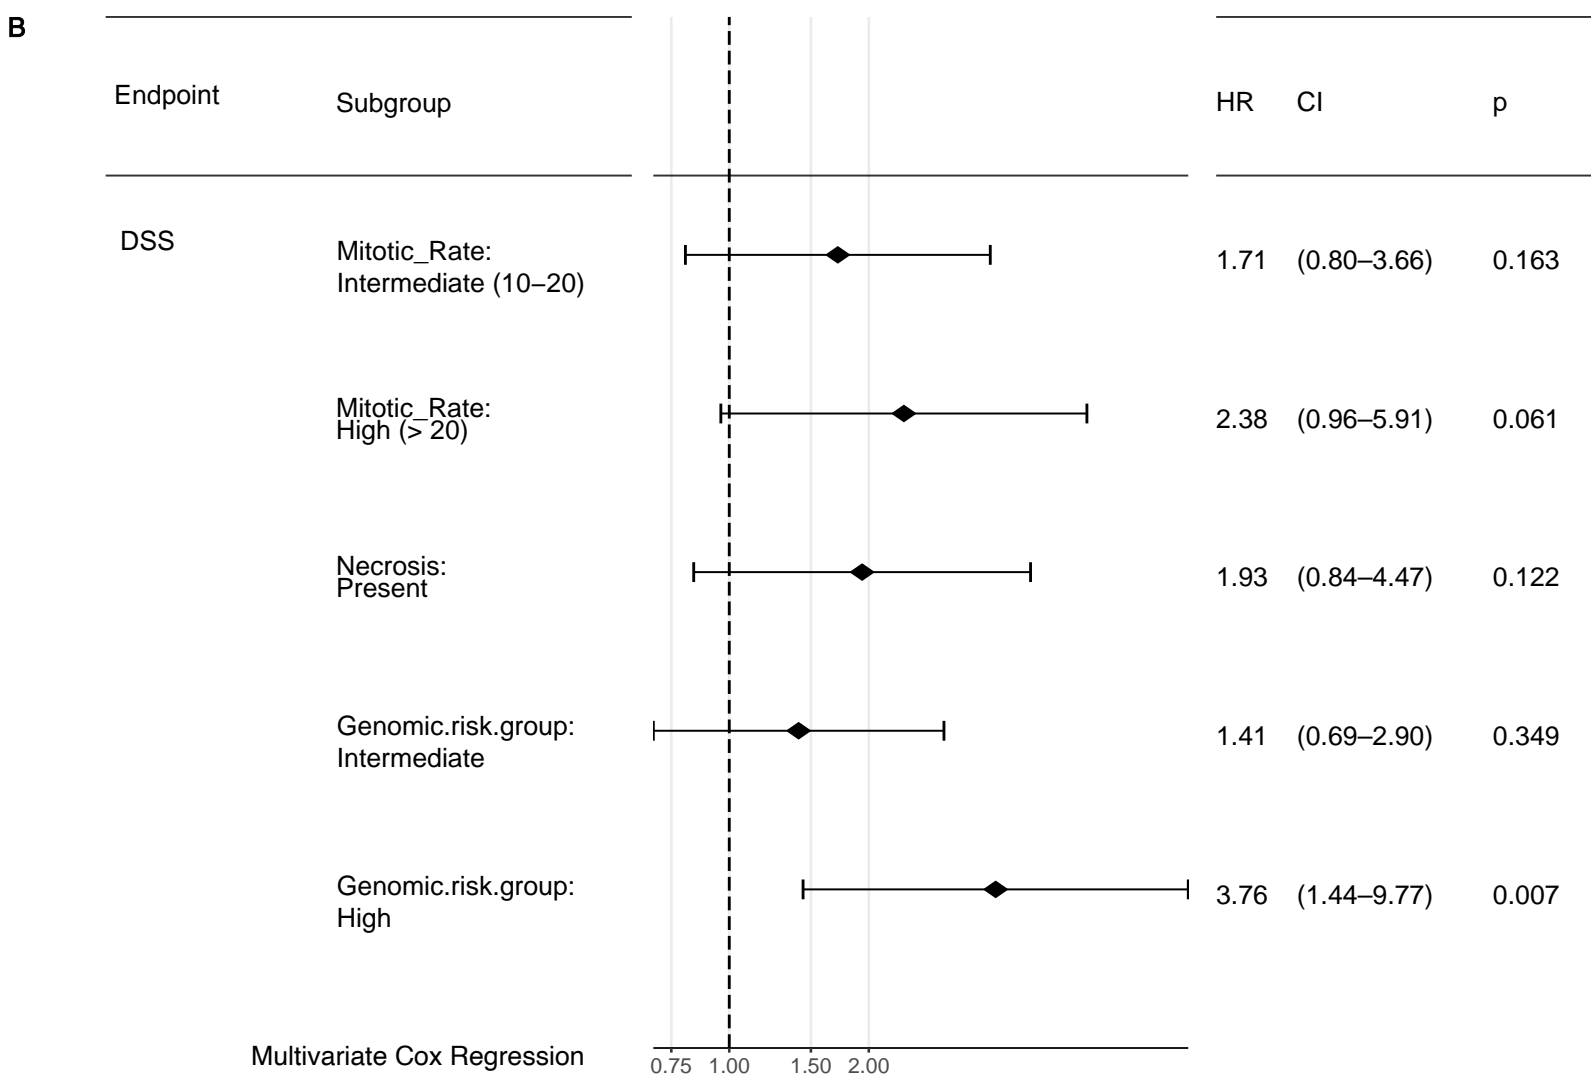

**Supplementary Figure S5.** A. Forest plot depicting univariate Cox regression analysis for clinicopathologic and genomic risk variables for DSS in STLMS patients. B. Forest plot depicting multivariate Cox regression analysis comparing mitotic rate and necrosis with high genomic risk group for DSS in STLMS patients.
