# Supplementary material
Source: PubMed Central journal article supplement (PMC11096044)
Supplement: NIHMS1979611-supplement-8.pdf [file NIHMS1979611-supplement-8.pdf]

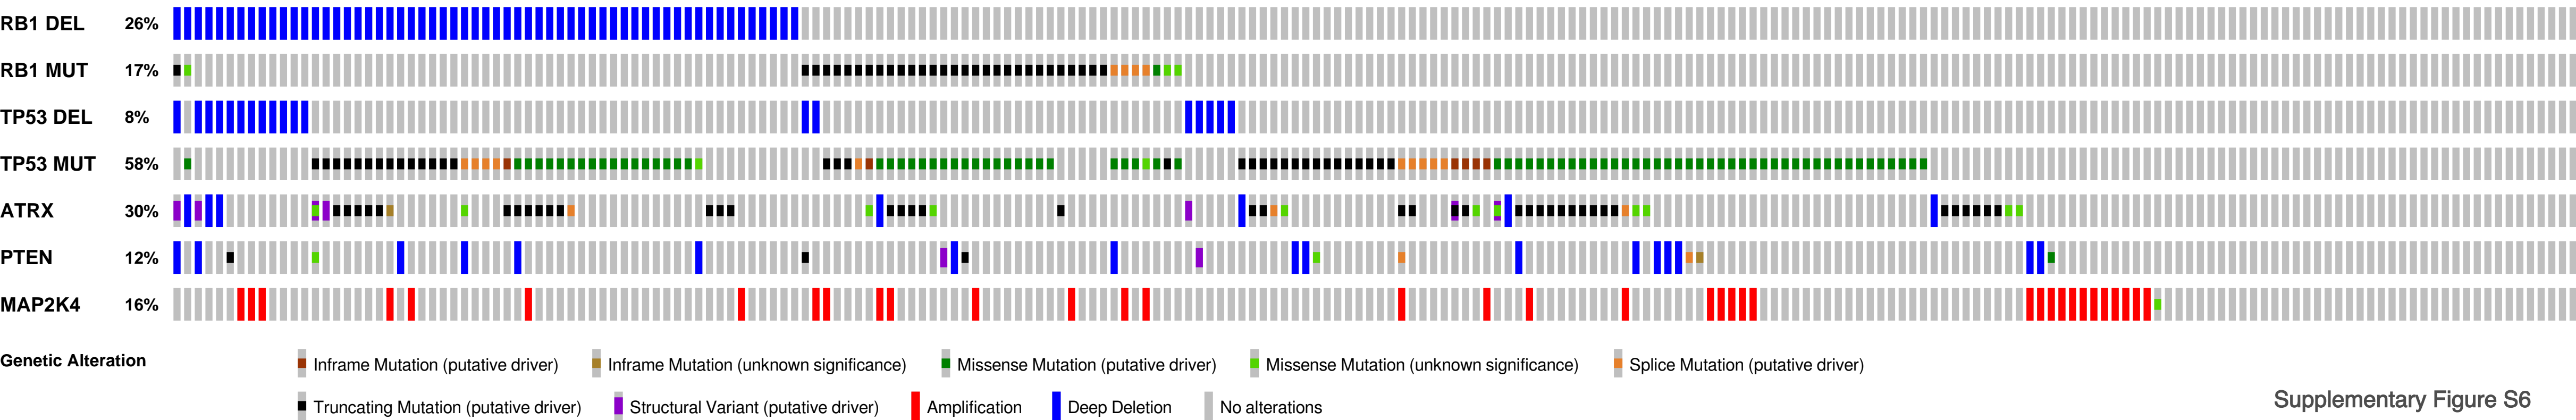

**Supplementary Figure S6.** Oncoprint depicting frequency of TP53, RB1, ATRX, PTEN, and MAP2K4 in the AACR GENIE STLMS cohort.
