# Supplementary material
Source: PubMed Central journal article supplement (PMC11096044)
Supplement: NIHMS1979611-supplement-9.pdf [file NIHMS1979611-supplement-9.pdf]

Soft Tissue Leiomyosarcoma (MSKCC, All Cases)

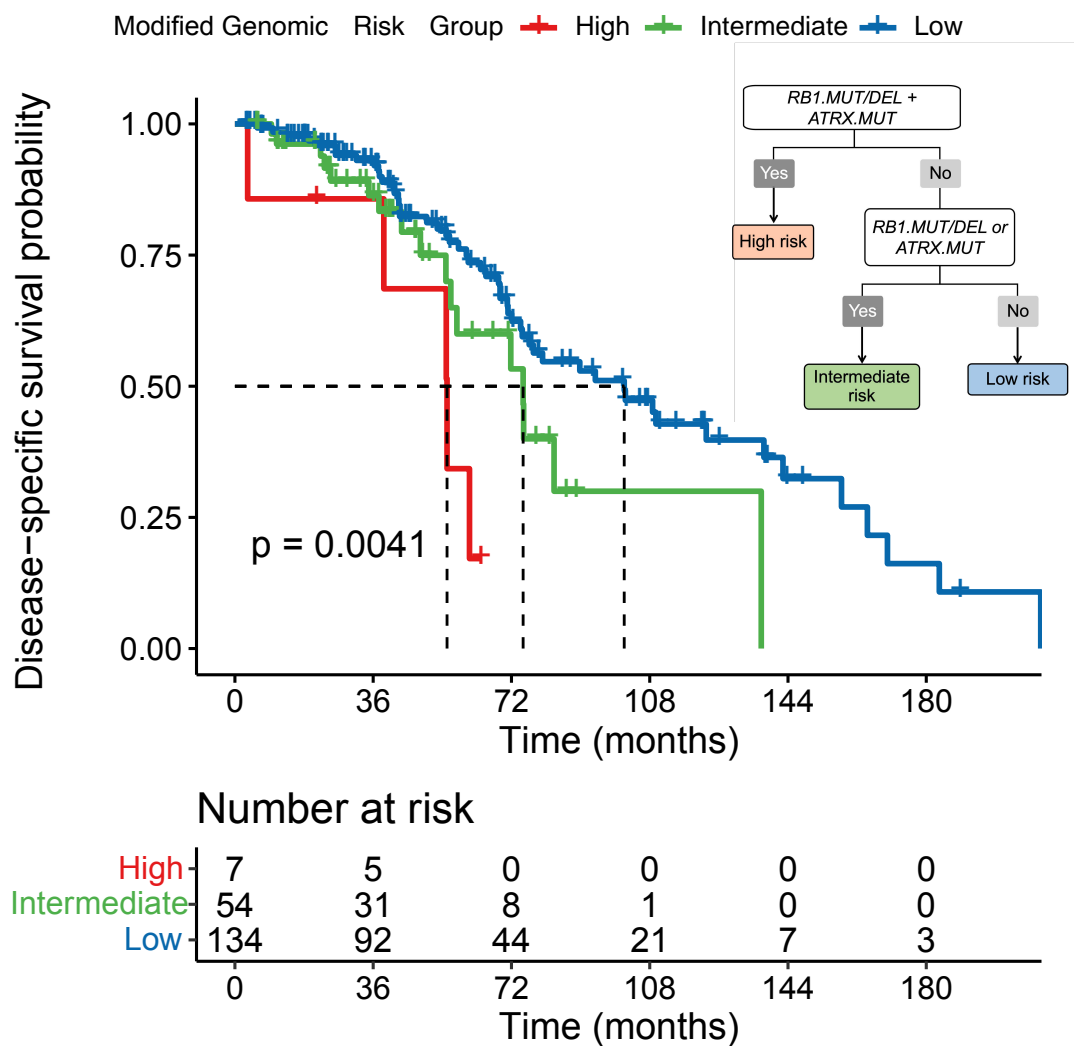

**Supplementary Figure S7.** Modified 3-tier genomic risk stratification in STLMS cohort. DSS represented by Kaplan-Meier curves.
