# Supplementary material
Source: PubMed Central journal article supplement (PMC11096044)
Supplement: NIHMS1979611-supplement-10.pdf [file NIHMS1979611-supplement-10.pdf]

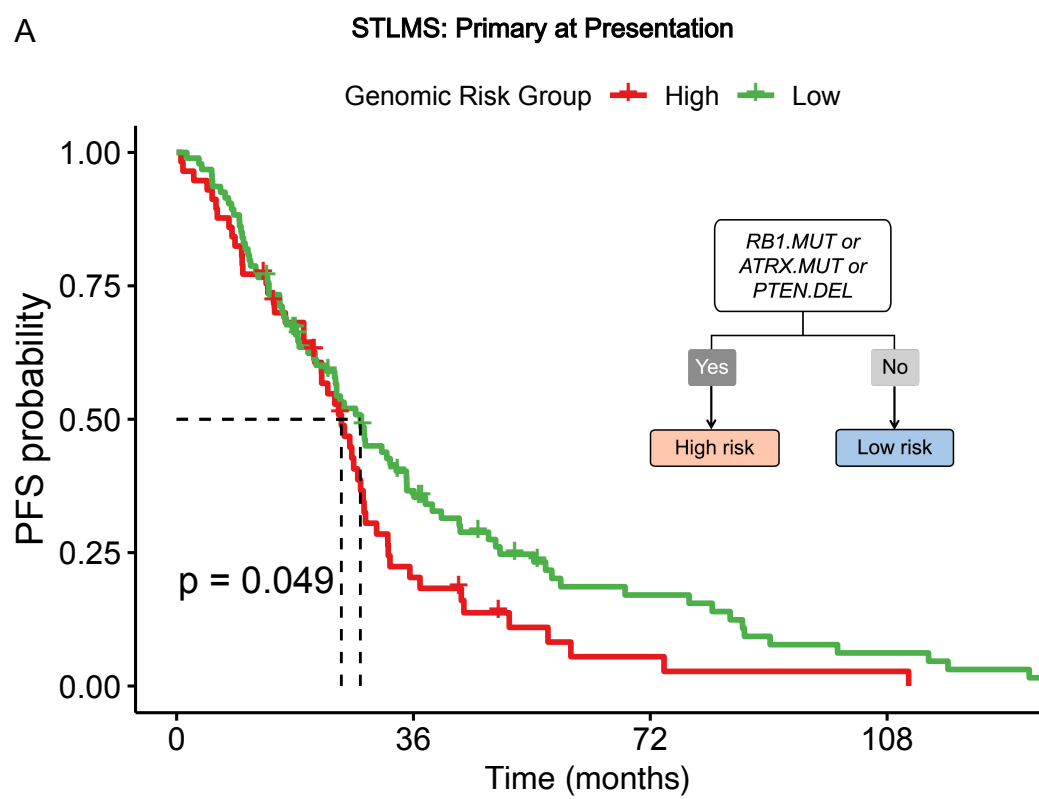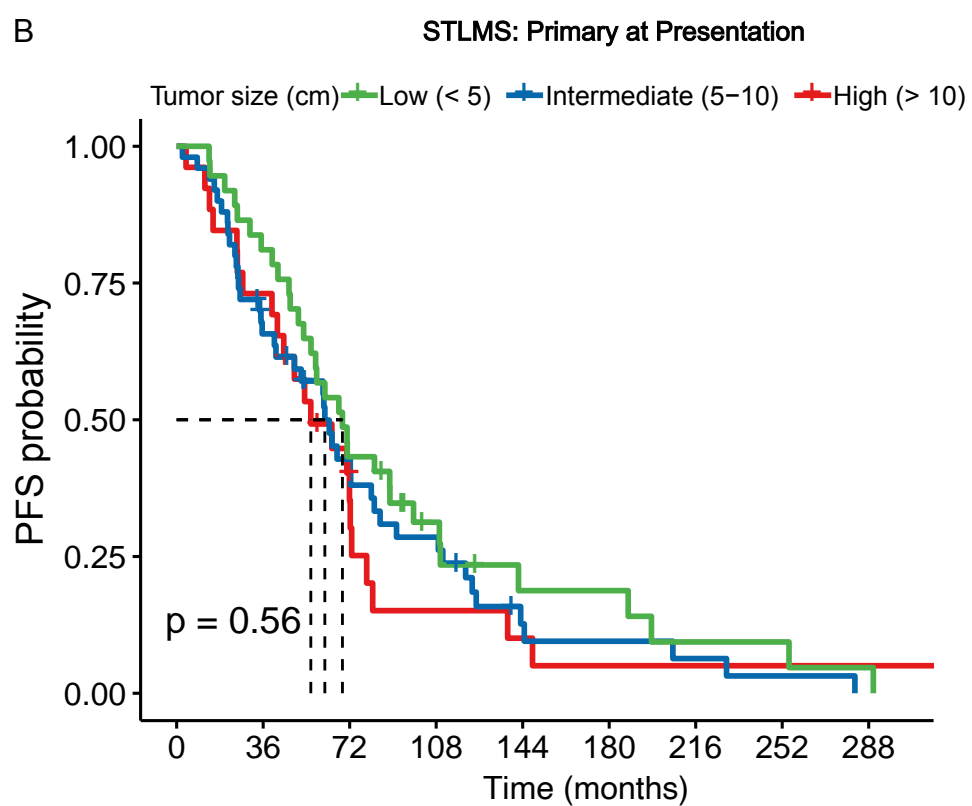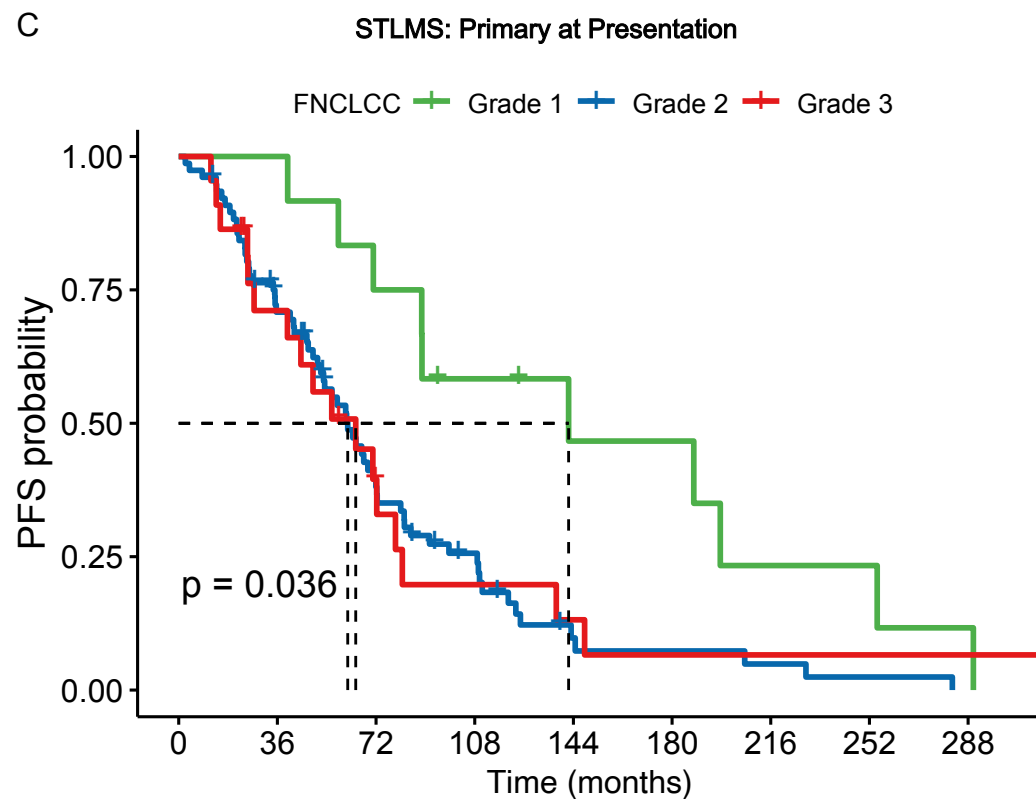

**Supplementary Figure S8.**

**Supplementary Figure S8.** STLMS genomic risk stratification for progression-free survival (PFS). A, A 2-tier genomic risk group is proposed for PFS. PFS for 151 patients with primary STLMS from the MSK cohort with low- and high-risk genomic groups is represented by Kaplan-Meier curves.
