# Supplementary material
Source: PubMed Central journal article supplement (PMC11096044)
Supplement: NIHMS1979611-supplement-11.pdf [file NIHMS1979611-supplement-11.pdf]

Suppl. Fig. S9

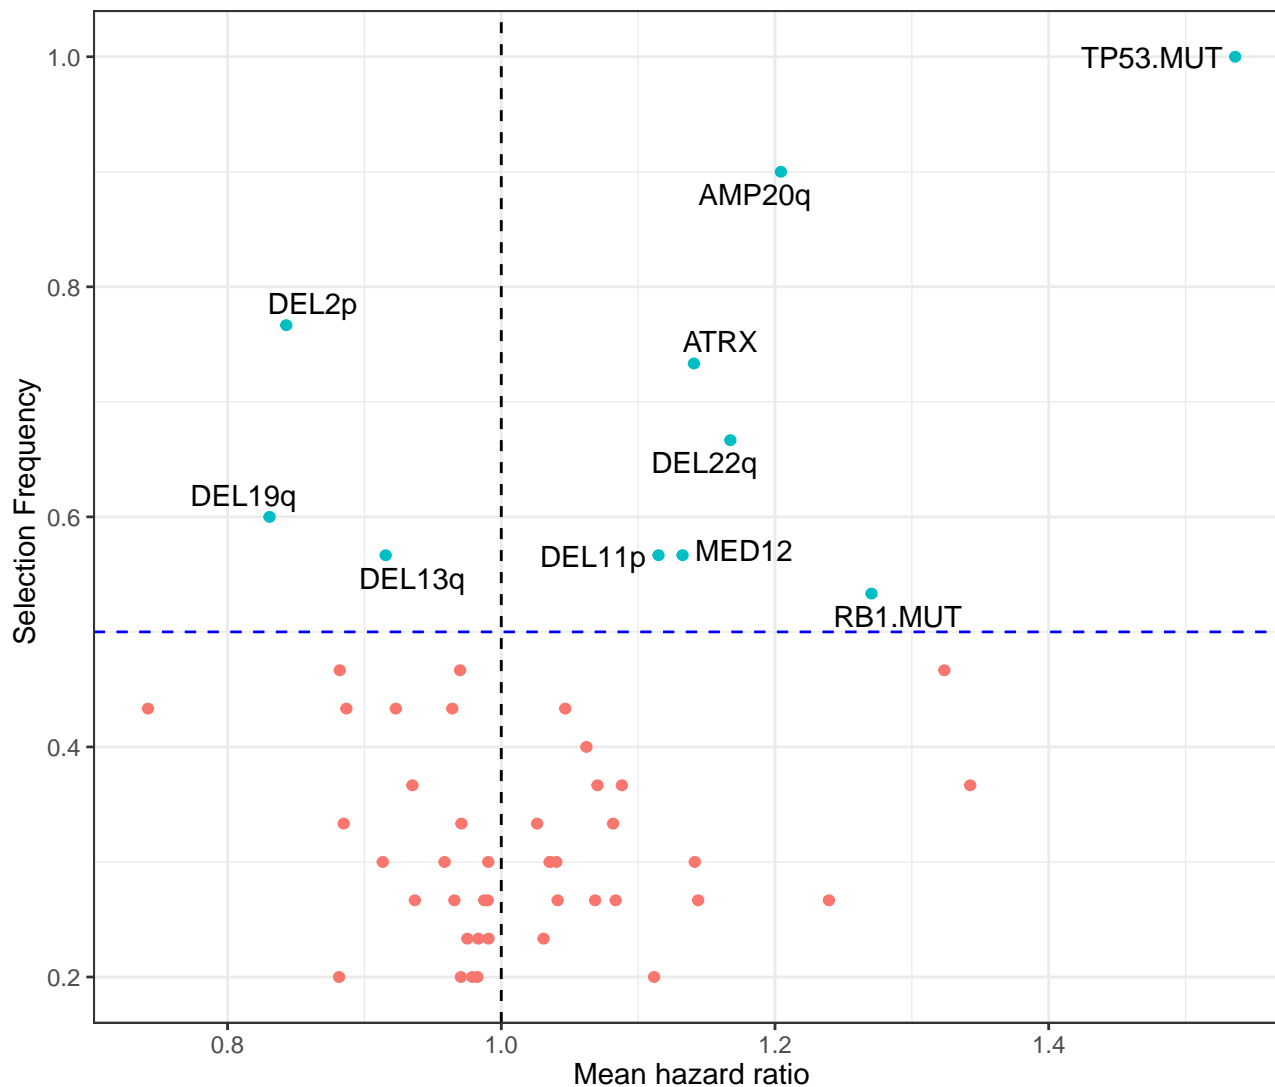

**Supplementary Figure S9.** MSKCC ULMS cohort. Genomic variables (gene level point mutations and copy number changes and chromosomal arm level changes) are input into the OncoCast model using the elastic net (“ENET”) approach, with outcome being overall survival. Variable importance is assigned and visualized in a plot by selection frequency (the event frequency of that feature in the data) and Cox proportional hazard ratios. Dotted lines indicate threshold of 0.50 selection frequency and hazard ratio of 1.
