# Supplementary material
Source: PubMed Central journal article supplement (PMC11096044)
Supplement: NIHMS1979611-supplement-12.pdf [file NIHMS1979611-supplement-12.pdf]

### Uterine Leiomyosarcoma (All Cases)

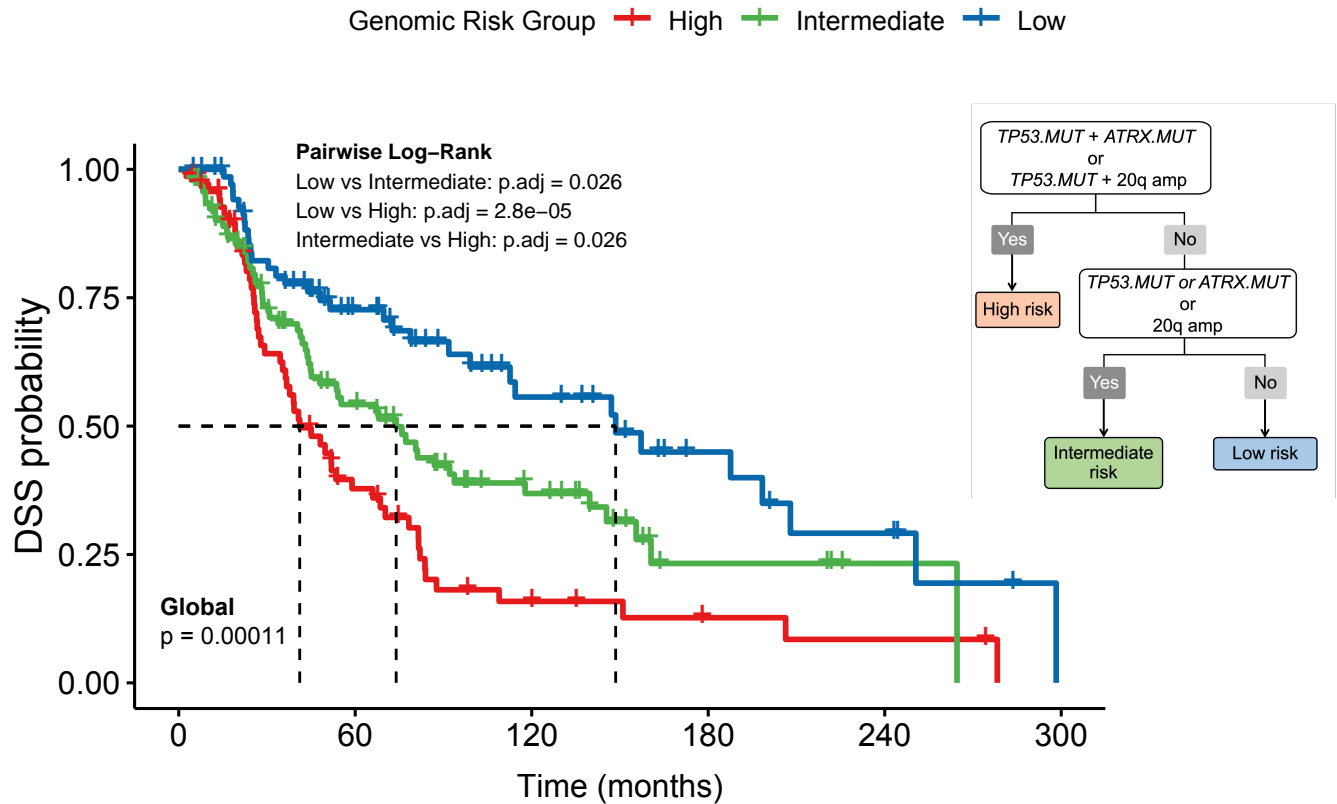

**Supplementary Figure S10.** ULMS genomic risk stratification for disease-specific survival (DSS). A 3-tier genomic risk group is proposed for DSS. DSS for 238 ULMS patients from the MSK cohort in low, intermediate, and high-risk genomic groups is represented by Kaplan-Meier curves (global log-rank P and Benjamin-Hochberg adjusted P-values by pairwise analysis).
